# Supplementary material for: Induction of 3-hydroxy-3-methylglutaryl-CoA reductase mediates statin resistance in breast cancer cells
Source: PubMed Central journal article supplement (PMC6349912; doi:10.1038/s41419-019-1322-x), 2019-01-28

# Suppl.Fig.7

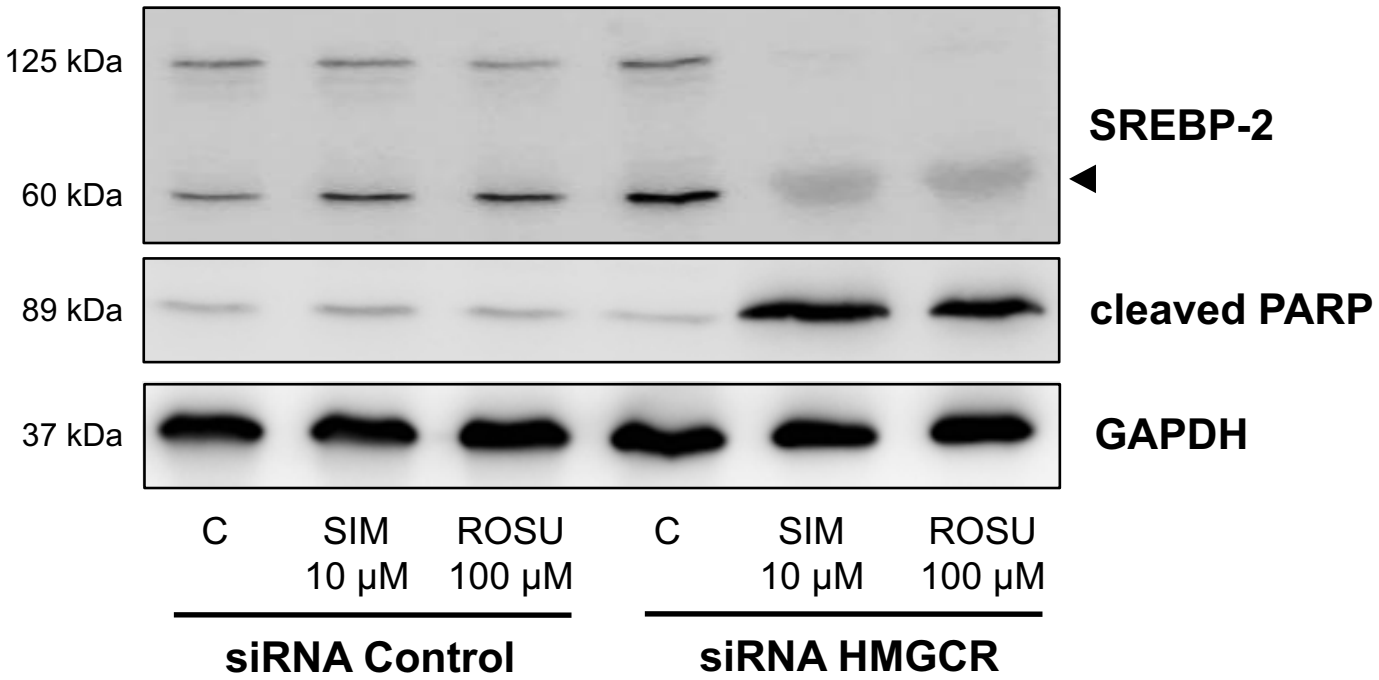

Supplement: 41419_2019_1322_MOESM7_ESM.pdf [file 41419_2019_1322_MOESM7_ESM.pdf]
